1 **Title**

2 SIARF10, an auxin response factor, is required for chlorophyll and sugar  
3 accumulation during tomato fruit development

4

5 **Running title**

6 SIARF10 is required for chlorophyll and sugar accumulation in tomato fruit

7

8 **Authors**

9 Lihua Mei<sup>1,2</sup> (e-mail: 1228799760@qq.com)

10 Yujin Yuan<sup>1,2</sup> (e-mail: 73781915@qq.com)

11 Mengbo Wu<sup>2</sup> (e-mail: 664313622@qq.com)

12 Zehao Gong<sup>2</sup> (e-mail: 824601591@qq.com)

13 Qian Zhang<sup>3</sup> (e-mail: zqcherish@sina.cn)

14 Fengqing Yang<sup>3</sup> (e-mail: fengqingyang@cqu.edu.cn)

15 Qiang Zhang<sup>2</sup> (e-mail: 303113412@qq.com)

16 Yingqing Luo<sup>2</sup> (e-mail: 1823385503@qq.com)

17 Xin Xu<sup>2</sup> (e-mail: 1070175265@qq.com)

18 Wenfa Zhang<sup>2</sup> (e-mail: 1217224432@qq.com)

19 Mingjun Miao<sup>4</sup> (e-mail: 308582144@qq.com)

20 Zhengguo Li<sup>2</sup> (e-mail: Zhengguoli@cqu.edu.cn)

21 Wei Deng<sup>2,\*</sup> (e-mail: dengwei1977@cqu.edu.cn)

22

23 <sup>2</sup>School of Life Science, Chongqing University, Chongqing 400044, China

24 <sup>3</sup>School of Chemistry and Chemical Engineering, Chongqing University, Chongqing  
25 400044, China

26 <sup>4</sup>Horticulture Research Institute, Sichuan Academy of Agricultural Sciences, Chengdu  
27 610066, China

28

29 \*Correspondence author: Wei Deng (e-mail: dengwei1977@cqu.edu.cn, Tel: +86  
30 18623127580)

31 <sup>1</sup>These authors contributed equally to this work.

32

33

34

35 **Abbreviations**

|           |                                      |
|-----------|--------------------------------------|
| ARFs      | Auxin Response Factors               |
| RNAi      | RNA interference                     |
| GLK       | GOLDEN2-LIKE                         |
| DET1/hp2  | The DE-ETIOLATED 1                   |
| DDB1      | UV-DAMAGED DNA-BINDING PROTEIN 1     |
| KNOX      | Class I KNOTTED1-LIKE HOMEBOX        |
| GC-MS     | Gas Chromatography–Mass Spectrometry |
| qRT-PCR   | Quantitative real time PCR           |
| TFs       | Transcription factors                |
| WT        | Wild-type                            |
| MR        | Middle region                        |
| DB domain | DNA binding domain                   |
| CTD       | C-terminal interaction domain        |
| AD        | Transcriptional activators           |
| RD        | Transcriptional repressors           |
| B3        | N-terminal DNA-binding domain        |

36

37 **Highlight**

38 *SIARF10* played an important role in the chlorophyll accumulation and  
39 photosynthesis in tomato fruits. *SIARF10* was involved in starch accumulation by  
40 controlling the expression of starch synthesis related enzyme genes. *SIARF10* may  
41 regulate the expression of *SIGLKI*, thus controlling chlorophyll accumulation,  
42 photosynthesis rates and sugars synthesis in tomato fruits.

43

44 **Abstract**

45 Tomato green fruits photosynthesis contributes to fruit growth and carbon economy.  
46 Tomato auxin response factor 10 (*SIARF10*) is one of the members of ARF family.  
47 Our results showed that *SIARF10* locates in the nucleus and has no transcriptional  
48 activity. *SIARF10* was expressed in various tomato tissues, but highly expressed in  
49 green fruit. Up-regulation of *SIARF10* produced dark green phenotype of fruits,  
50 whereas down-regulation of *SIARF10* had light green phenotype. Autofluorescence  
51 and chlorophyll content analysis confirmed the phenotypes, which indicated that  
52 *SIARF10* plays an important role in chlorophyll accumulation in tomato fruits.

53 Up-regulation of *SIARF10* increased the photochemical potential in tomato leaves and  
54 fruits. Furthermore, the *SIARF10* up-regulating lines displayed improved  
55 accumulation of starch in fruits, whereas *SIARF10* suppressed lines had inhibited  
56 starch accumulation. Up-regulation of *SIARF10* increased the expression of *AGPases*,  
57 the starch biosynthesis genes. *SIARF10* up-regulating lines had increased  
58 accumulation of *SIGLK1* and *SIGLK2* transcripts in fruits. The promoter sequence of  
59 *SIGLK1* gene had two conserved ARF binding sites. *SIARF10* may regulate the  
60 expression of *SIGLK1*, thus controlling chlorophyll accumulation, photosynthesis  
61 rates and sugars synthesis in fruits. Our study provided more insight on the link  
62 between auxin signaling, chloroplastic activity and sugar metabolism during the  
63 development of tomato fruits.

64

#### 65 **Keywords**

66 Fruit, Tomato, Auxin, ARF10, Chlorophyll, Sugar

67

#### 68 **Introduction**

69 Tomato (*Solanum lycopersicum*) a multicarpellar berry with strong adaptability, high  
70 yield, nutrient-rich, widely used, has become the world's second largest vegetable  
71 crop (Tanksley, 2004). Tomato fruit has arisen as the research model species for fleshy  
72 fruits, due to a short life cycle, self-pollination, and ease of mechanical crossing and  
73 genetic transformation (Klee and Giovannoni, 2011).

74 Fruit development can be divided into three main stages (Ho and Hewitt, 1986).  
75 The first stage is characterized by an intense mitotic activity, with an increased cell  
76 number and starch accumulation (Ho, 1996). Cell enlargement associated with the  
77 degradation of starch into soluble sugars, is characterized at the second stage of fruits  
78 (Schaffer and Petreikov, 1997). The third stage corresponds to the fruit ripening,  
79 associated with the conversion from chloroplast to chromoplast and accumulation of  
80 carotenoids, sugars, organic acids, and volatile aroma compounds in the fruit cells  
81 (Klee and Giovannoni, 2011). The accumulation of soluble solids in ripening tomato  
82 fruit is related to the starch level in immature and mature green fruit (Davies and  
83 Cocking, 1965). It was reported that between 10% and 15% of the total carbon of the  
84 fruit growth and net sugar accumulation has been contributed from photosynthetic  
85 activity in the fruit itself (Tanaka *et al.*, 1974; Obiadalla-Ali *et al.*, 2004). Thus  
86 chloroplast development and photosynthetic activity of green fruits affect the

87 composition and quality of ripening tomato fruit (Nadakuduti *et al.*, 2014).

88 It has been reported that several genes influence the development of fruit  
89 chloroplasts and the subsequent quality of ripening fruit in tomato. The  
90 DE-ETIOLATED 1 (DET1/hp2) and UV-DAMAGED DNA-BINDING PROTEIN 1  
91 (DDB1/hp1) genes encode negative regulators of photomorphogenesis.  
92 Down-regulation of DET1/hp2 and DDB1/hp1 genes increased number of  
93 chloroplasts and plastid compartment size, leading to fruits with higher levels of  
94 chlorophyll and carotenoids in tomato fruits (Liu *et al.*, 2004; Kolotilin *et al.*, 2007;  
95 Rohrmann *et al.*, 2011). GOLDEN2-LIKE (GLK) transcription factors are required  
96 for chloroplast and chlorophyll levels (Waters *et al.*, 2008). Tomato contains two  
97 GLKs, GLK1 and GLK2, which encode functionally similar peptides. Differential  
98 expression renders *GLK1* more important in leaves and *GLK2* is predominant in fruit.  
99 The latitudinal gradient of *GLK2* expression affects the typical uneven coloration of green and  
100 ripe wild type fruit of tomato (Nguyen *et al.*, 2014). Tomato ARABIDOPSIS PSEUDO  
101 RESPONSE REGULATOR 2-LIKE (SIAPRR2-like) is closest global relative of  
102 SIGLK2. Overexpression of APRR2-like gene in tomato produced larger and more  
103 numerous chloroplasts, and consequently higher chlorophyll levels in green fruits and  
104 higher carotenoid amounts in red ripening fruits (Pan *et al.*, 2013). Two Class I  
105 KNOTTED1-LIKE HOMEODOMAIN (KNOX) proteins, TKN2 and TKN4 positively  
106 influence *SIGLK2* and *SIAPRR2-LIKE* expression to promote fruit chloroplast  
107 development in tomato fruit (Nadakuduti *et al.*, 2014).

108 Phytohormones were reported to be involved in chloroplast development and the  
109 quality of ripening fruit (Martineau *et al.*, 1994; Galpaz *et al.*, 2008; Sagar *et al.*,  
110 2013). Studies of the auxin signaling transduction pathway indicated that auxin  
111 response factors (ARFs) are required for auxin-dependent transcriptional regulation in  
112 plant, and ARFs can function as either transcriptional activators or repressors of  
113 auxin-responsive genes (Ren *et al.*, 2011). Most ARF proteins contain an N-terminal  
114 DNA-binding domain (B3) involved in transcription of auxin response genes, a  
115 middle region acting as an activation domain (AD) or repression domain (RD), and a  
116 C-terminal dimerization domain (Aux/IAA) requiring the formation of heterodimers  
117 or homodimers (Zouine *et al.*, 2014). An increasing number of studies demonstrate  
118 that ARFs play important roles in many developmental processes of tomato (Krogan  
119 *et al.*, 2011; Wang *et al.*, 2012; Guan *et al.*, 2013; Ckurshumov *et al.*, 2014; Liu *et al.*,  
120 2014; Zhang *et al.*, 2015). SIARF7 acts as a negative regulator of fruit set and

121 development in tomato (De Jong *et al.*, 2009). ARF6 and ARF8 have important roles  
122 in controlling flower growth and development (Liu *et al.*, 2014). SIARF9 is required  
123 for regulation of cell division during early tomato fruit development (De Jong *et al.*,  
124 2015). SIARF3 is involved in the formation of epidermal cells and trichomes (Zhang  
125 *et al.*, 2015). ARF4 was reported to control the accumulation of chlorophyll and starch  
126 in the tomato fruit (Jones *et al.*, 2002; Sagar *et al.*, 2013). The influence of ARF4 on  
127 fruit chlorophyll accumulation seems to be mediated through the transcriptional  
128 up-regulation of SIGLK1 in the fruit of tomato (Sagar *et al.*, 2013).

129 Hendelman *et al.* (2012) reported that SIARF10 is posttranscriptionally regulated  
130 by Sl-miR160, and constitutive expression of the *mSIARF10* (Sl-miR160a-resistant  
131 version) produced narrow leaflet blades, sepals and petals, and abnormally shaped  
132 fruit in tomato plants. Repression of SIARF10 expression by Sl-miR160 is essential  
133 for auxin-mediated blade outgrowth and early fruit development (Hendelman *et al.*,  
134 2012). In the present study, the functions of *SIARF10* were studied in the development  
135 of tomato fruit. Our results indicated that SIARF10 gene is involved in chlorophyll  
136 and sugar accumulation in tomato fruit. This study expands our understanding of  
137 functions of ARFs during the development of tomato fruit and provides new insight  
138 into the regulation mechanism of the chlorophyll and sugar accumulation in tomato  
139 fruit.

140

## 141 **Materials and methods**

### 142 **Plant Materials and Growth Conditions**

143 Tomato (*Solanum lycopersicum* L. cv. Micro-Tom) plants were grown under culture  
144 chamber conditions with 16 h light (25±2°C)/8 h dark (18±2°C) and 80% relative  
145 humidity.

### 146 **Analysis of expression patterns**

147 The expression pattern was analyzed online using the tomato gene expression  
148 database (<http://gbf.toulouse.inra.fr/tomexpress/www/welcomeTomExpress.php>).  
149 Total RNA was extracted using a Plant RNeasy Mini kit (Qiagen). qRT-PCR was  
150 carried out as described previously (Deng *et al.*, 2012).

### 151 **Subcellular localization of SIARF10**

152 To construct SIARF10-GFP fusion expression vector, the forward  
153 5'-ATGAAGGAGGTTTTGGAGAAGTG-3' and reverse  
154 5'-CTATGCAAAGATGCTAAGAGGTC-3' primers were used to amplify the

155 sequence of *SIARF10* coded frames. Protoplasts were obtained from  
156 suspension-cultured tobacco (*Nicotiana tabacum*) Bright Yellow-2 cells and  
157 transfected by SIARF10-GFP fusion expression vector. Transformation assays were  
158 performed as described previously (Chaabouni *et al.*, 2009).

#### 159 **Transcriptional activation activity of SIARF10**

160 The ORF of *SIARF10* was amplified by using the  
161 5'-TCCCCCGGGGATGAAGGAGGTTTTGGAGAA-3' and  
162 5'-CGGGATCCCTATGCAAAGATGCTAAGAGGTC-3' primers, and fused to the  
163 GAL4 DNA-binding (DB) domain to generate pGBKT7-SIARF10 fusion construct  
164 (DB-SIARF10). The vectors were transformed into Y2H gold yeast cells and yeast  
165 cells were grown on plates with minimal medium without tryptophan (SD-W) or  
166 without tryptophan, histidine, and adenine (SD-W/H/A). The transcriptional activation  
167 activity was verified according to the growth status and activity of  $\alpha$ -galactosidase  
168 ( $\alpha$ -gal).

#### 169 **Generation of transgenic plants**

170 The ORF sequence of *SIARF10* was amplified by the forward  
171 5'-TCCCCCGGGGATGAAGGAGGTTTTGGAGAA-3' and reverse  
172 5'-CGGGATCCCTATGCAAAGATGCTAAGAGGTC-3' primers. The sequence was  
173 cloned into plant binary vector pLP100, resulting in overexpression vector. For  
174 construction of the RNAi vector, the 200 bp sequences of SIARF10 were amplified  
175 and the PCR products were inserted around a spacer of the  $\beta$ -glucuronidase gene in  
176 pCAMIBA2301 driven by a Cauliflower mosaic virus (CaMV) 35S promoter.  
177 Transgenic plants were generated via *Agrobacterium tumefaciens*-mediated  
178 transformation according to the method described by Jones *et al.* (2002). All  
179 experiments were performed using homozygous lines of T3 generations. For analysis  
180 of expression levels of SIARF10 in RNAi and overexpression transgenic lines, Total  
181 RNA was extracted using a Plant RNeasy Mini kit (Qiagen) and qRT-PCR was  
182 carried out as described previously (Deng *et al.*, 2012).

#### 183 **Analysis of chlorophyll in tomato**

184 The chlorophyll content was measured from fruit pericarp and leaves according to  
185 the methods described by Powell *et al.*, (2012). For determination of autofluorescence  
186 of chlorophylls of tomato fruits, the pericarp was peeled off tomato fruits and  
187 observed under the laser confocal microscope.

#### 188 **Determination of photosynthetic substance**

189 One gram of tomato fruits was ground by liquid nitrogen and extracted with 10ml  
190 80% ethanol at 80°C for 30min. After centrifuge, the super natant was dried in  
191 vacuum, evaporated to dryness and dissolved with 3 mL distilled water. One mL of  
192 dissolved samples was used for measurement of the contents of glucose, fructose,  
193 sucrose and lactose by using HPLC. The pellet of tomato fruits was used for starch  
194 analysis. Four mL of 0.2 M KOH were added to the pellet at 100°C for 30 min. Each  
195 sample was added to 1.48 mL of 1 M acetic acid, adjusted to pH 4.5, hydrolyzed with  
196 7 Units of amyloglucosidase for 45 min, and dissolved with 10 mL distilled water.  
197 One mL of dissolved samples was used for measurement of the starch content by  
198 using HPLC.

199 HPLC analysis was performed on an Agilent 1260 Series liquid chromatography  
200 system (Agilent Technologies, California, USA), which equipped with a waters  
201 XBridge Amide column (4.6×150 mm i. d., 3.5 µm) and a pre-column (Waters  
202 XBridge BEH Amide column, 3.9×5 mm i. d., 3.5 µm).

203

## 204 **Results**

### 205 **SIARF10 belongs to ARF family, expressed mainly in tomato fruits**

206 Amino acids sequences analysis was conducted to detect the domains of SIARF10. It  
207 was found that SIARF10 had the B3-DNA, the ARF and the AUX/IAA domains,  
208 which indicates that SIARF10 has the typical ARF conserved domains and belongs to  
209 ARF family.

210 The expression profiles of *SIARF10* gene in tomato plants were analyzed by online  
211 database and qRT-PCR. The database analysis revealed that SIARF10 gene is  
212 expressed in all tissues tested, including roots, stems, leaves, flowers and fruits. The  
213 expression level of SIARF10 gene is high in the fruit, especially in immature green,  
214 mature green and breaker fruits (Fig. 1A). qRT-PCR analysis also showed the similar  
215 expression profiles with high expression level of *SIARF10* in immature green, mature  
216 green and breaker fruits (Fig. 1B). The results indicate SIARF10 gene may be  
217 involved in the development of tomato fruit.

### 218 **Subcellular localization and transcriptional activity of SIARF10**

219 The amino acid sequence analysis found that SIARF10 has a nuclear localization  
220 signal peptide. In order to verify the location of SIARF10 in nucleus, SIARF10-GFP  
221 fusion protein vectors were constructed and transferred into tobacco protoplasts to

222 analyze the subcellular localization of SIARF10. The green fluorescence of the  
223 SIARF10-GFP fusion protein was distributed in the nucleus (Fig. 2A), which  
224 indicated that SIARF10 is located in the nucleus.

225 A GAL4-responsive reporter system in yeast was used to analyze the  
226 transcriptional activity of SIARF10. The pGBKT7 plasmid contains the DNA binding  
227 domain (BD domain) and SIARF10 was fused to the GAL4-BD to generate  
228 pGBKT7-SIARF10 fusion plasmid and transformed into yeast. As shown in Fig 2B,  
229 the transformed yeast cell containing pGBKT7-SIARF10 recombinant plasmid could  
230 not grow on the medium lacking Trp, His, and Ade (SD-W/H/A), which is same with  
231 the yeast cell harbouring pGBKT7 plasmid (negative control). This result indicated  
232 that SIARF10 may be a transcriptional repressor.

### 233 **SIARF10 is involved in chlorophyll accumulation in tomato fruits**

234 In order to elucidate the functions of SIARF10 gene in the development of tomato  
235 fruit, up-regulation and down-regulation of SIARF10 in tomato plants were obtained  
236 by using transgenic techniques. Ten homozygous down-regulated transgenic lines  
237 (RNAi-SIARF10) and eleven homozygous up-regulated lines (OE-SIARF10) were  
238 generated corresponding to independent transformation events. The T2  
239 RNAi-SIARF10 and OE-SIARF10 transgenic lines with lower and higher  
240 accumulation of *SIARF10* transcripts, respectively, were selected for further study  
241 (Fig. 3A). The OE-SIARF10 lines had a dark-green fruits, while the RNAi-SIARF10  
242 lines had light-green fruits compared with wild-type (WT) plants at green fruit stage  
243 (Fig. 3B). Moreover, the fruit colors of the transgenic lines were not significantly  
244 different with the WT lines at breaker, orange and red ripe stages (Fig. 3B).

245 Furthermore, the chlorophyll contents of green fruit and leaves were analyzed in  
246 SIARF10 transgenic plants. The RNAi-SIARF10 and OE-SIARF10 transgenic lines  
247 showed obviously lower and higher accumulation of chlorophyll content, respectively,  
248 in green fruit and leaves (Fig. 4A, 4B). Moreover, confocal laser scanning microscopy  
249 was used to detect the autofluorescence of chlorophylls in pericarp of tomato fruits.  
250 The OE-SIARF10 lines had strong chlorophylls autofluorescence, whereas the  
251 RNAi-SIARF10 lines had weak autofluorescence in pericarp of green fruits (Fig. 4C).  
252 Our results indicated that *SIARF10* is involved in the chlorophyll accumulation and  
253 regulation of *SIARF10* can control the chlorophylls contents in tomato fruit.

254 The increased chlorophyll content in the fruits and leaves may potentially confer  
255 higher photosynthetic performance in the transgenic plants. The photochemical



256 potential was measured in the fruits and leaves of RNAi-SIARF10 and OE-SIARF10  
257 lines. The OE-SIARF10 lines had increased photochemical potential in the fruits and  
258 leaves, whereas the RNAi-SIARF10 lines had decreased in leaves (Fig. 5). Totally,  
259 our results indicate that regulation of expression of SIARF10 gene can control the  
260 chlorophyll formation and photosynthesis in tomato plants.

261

### 262 **SIARF10 affects the synthesis of photosynthetic substances in tomato fruits**

263 Because sugar is the main product of chloroplast activity and photosynthesis, the  
264 sugar accumulation was determined in the SIARF10 transgenic plants. The cut fruits  
265 at different stages were stained with iodine to determine starch contents. The  
266 blue-purple color, indicative of the presence of starch, was mainly found in immature  
267 green fruit and mature green fruit (Fig. 6A). The OE-SIARF10 lines displayed more  
268 intense staining than that of WT plants, while the RNAi-SIARF10 showed less intense  
269 staining in green fruits (Fig. 6A). Furthermore, the starch content was measured by  
270 using HPLC method. The starch accumulated over the early green stages and rapidly  
271 degraded at the orange stage during tomato fruit development. Up-regulation of  
272 *SIARF10* obviously improved the accumulation of starch at green and breaker stages  
273 compared with WT plants (Fig. 6B), whereas down-regulation of *SIARF10* inhibited  
274 the starch accumulation at immature green stages of tomato fruits (Fig. 6C). Our  
275 results indicated that regulation of expression of SIARF10 gene controls starch  
276 synthesis in tomato green fruits.

277 It is known that starch degradation is the main source of soluble sugars. We  
278 assessed the impact of up-regulation and down-regulation of *SIARF10* on the contents  
279 of fructose, glucose, sucrose and lactose in tomato fruits. OE-SIARF10 lines had  
280 significantly higher fructose content than that in the WT plants at the breaker and  
281 orange stages (Fig. 7A), whereas RNAi-SIARF10 lines had no obvious difference  
282 during tomato fruits development (data not shown). Also there were no distinct  
283 differences between WT, OE-SIARF10 lines (Fig. 7B) and RNAi-SIARF10 lines (data  
284 not shown) in glucose content. For the disaccharide, the contents of sucrose and  
285 lactose in OE-SIARF10 line were significantly higher than that in WT lines (Fig. 7C,  
286 D). In RNAi-SIARF10 lines, the two disaccharides contents were lower than WT lines  
287 during tomato fruit development (Fig. 7E, F).

### 288 **SIARF10 regulates the expression of Starch Biosynthesis Genes**

289 To gain more insight into the mechanism of sugar metabolism in SIARF10 transgenic

290 plants, we analyzed the expression pattern of starch biosynthesis genes. *AGPase* genes,  
291 with four subtypes (*AGPase-L1*, *AGPase-L2*, *AGPase-L3* and *AGPase-S1*), are the  
292 most important enzyme in starch synthesis process, which catalyzes the first step  
293 reaction of starch synthesis. *AGPase-L1*, *AGPase-L2*, *AGPase-L3* and *AGPase-S1*  
294 genes show the higher levels of expression at different fruit development stages in  
295 OE-SIARF10 plants. The expression of *AGPase-L2*, *AGPase-L3* and *AGPase-S1* were  
296 significantly higher than that in WT plants in immature green fruit stage, but the  
297 expression of *AGPase-L1* was not significantly different (Fig. 8A). In the mature  
298 green fruit period, *AGPase-S1* had a significantly higher expression, while the other  
299 three genes had no obvious difference (Fig. 8B). In the fruit breaker period, only  
300 *AGPase-L1* and *AGPase-L2* genes displayed higher expression levels compared with  
301 WT plants (Fig. 8C). These results indicated that up-regulation of *SIARF10* gene  
302 improve the expression of *AGPase* genes.

### 303 **Up-regulation of *SIARF10* increased the expression levels of *SIGLK1* and *SIGLK2***

304 The chlorophyll and starch phenotypes of OE-SIARF10 plants are reminiscent of  
305 those described in *SIGLK* overexpression transgenic plants. The expression levels of  
306 two *GLK* genes, *SIGLK1* and *SIGLK2*, were analyzed in OE-SIARF10 and  
307 RNAi-SIARF10 plants. qRT-PCR showed increased accumulation of *SIGLK1* and  
308 *SIGLK2* transcripts in the fruits of OE-SIARF10 plants and decreased accumulation of  
309 the transcripts in the fruits of RNAi-SIARF10 plants (Fig. 9). Analysis of the  
310 promoter sequence of *SIGLK1* gene found two conserved ARF binding sites,  
311 TGTCTC box. These results indicated *SIARF10* may bind to TGTCTC box, thus  
312 regulating the expression of *SIGLK1* and controlling chlorophyll accumulation.  
313 Moreover, qRT-PCR showed there is no obvious difference between the WT and  
314 transgenic plants in the expression levels of *DDB1* and *THY5* genes (Fig. 9). This  
315 result indicated that the effect of *SIARF10* on chlorophyll accumulation acts  
316 independently of *DDB1* pathway. The expression levels of protochlorophyllide  
317 reductase gene (*PR*), chlorophyll binding protein 1 gene (*CBP1*), chlorophyll binding  
318 protein 2 gene (*CBP2*) were also analyzed in the transgenic plants. The *PR*, *CBP1*,  
319 *CBP2* had increased accumulation of transcripts in the fruits of OE-SIARF10 plants  
320 and decreased accumulation in the fruits of RNAi-SIARF10 plants.

321

## 322 **Discussion**

323 The phytohormone auxin regulates a wide variety of developmental processes by

324 modulating gene expression via a family of transcriptional regulators, namely, Auxin  
325 Response Factors (ARFs). ARFs act as transcriptional activator or repressor of  
326 auxin-responsive genes by direct binding to the promoter (Li *et al.*, 2016). Our  
327 research demonstrates that *SIARF10* scarcely has transcriptional activity. It is  
328 conceivable that ARF10 acts as a significant transcriptional repressor during plant  
329 growth and development.

330 Strikingly, previous studies on transactivation assays have indicated that 36% of  
331 tomato *ARFs* are strong repressors of transcriptional activity but only 22% work as  
332 transcriptional activators (Zouine *et al.*, 2014). It has been reported that full-length  
333 ARF1 and ARF2 repressed transcription with or without exogenous auxin treatment in  
334 Arabidopsis (Tiwari *et al.*, 2003). However, the repressor/activator ratio among *ARFs*  
335 in Arabidopsis (1.7) is less than half of that in tomato (3.6) (Zouine *et al.*, 2014).

336 Representative ARF proteins embrace a conserved N-terminal DNA Binding  
337 Domain (DBD) that regulates the expression of early auxin response genes, a  
338 nonconserved middle region (MR) that decides whether ARFs activate or repress  
339 target genes, and in most cases a conserved C-terminal interaction domain (CTD) that  
340 contributes to mediating interactions between ARFs, as well as between ARFs and  
341 their Aux/IAA inhibitors (Guilfoyle *et al.*, 2007; Boer *et al.*, 2014; Kim *et al.*, 1997). A  
342 preliminary conclusion based on transient expression assays can be draw that ARFs  
343 with Q-rich MRs function as transcriptional activators (AD) while a majority of other  
344 ARFs function as transcriptional repressors (RD) (Ulmasov *et al.*, 1999). To gain clues  
345 on the structural feature of ARF10 function as a potential transcriptional repressor,  
346 gene structure analysis was performed to differentiate ARF10 from other activators.  
347 ARF10 harbors a predicted repression domain in the MR and hence are predicted to  
348 function as RD (Zouine *et al.*, 2014), which is consistent with our speculation.

349 The chlorophyll content, as a critical feature of unripe fruits, affects the nutritional  
350 components and flavor of ripe fruit. Moreover, the link between chlorophyll content  
351 and photosynthesis or photosynthate metabolism in fruit tissues has been illuminated  
352 by a variety of studies (LopezJuez and Pyke, 2005; Nadakuduti *et al.*, 2014; Powell *et*  
353 *al.*, 2012), though the regulatory mechanisms by which this predominant pigment  
354 impacts photosynthetic capacity as well as photosynthate accumulation and therefore  
355 fruit quality remain unclear. Auxin plays a pivotal role in initiation of fleshy fruit  
356 development and determining final fruit size through the control of cell division as  
357 well as expansion (Sagar *et al.*, 2013; Devoghalaere *et al.*, 2012). Subsequently, auxin

358 impacts an array of crucial regulators, such as ethylene, ABA and *Rin*, and vital  
359 effectors, such as genes for  $\beta$ -xanthophyll and lycopene biosynthesis as well as for  
360 chlorophyll degradation (Su *et al.*, 2015; Manoharan *et al.*, 2017). It has also been  
361 suggested that *Arabidopsis thaliana* roots, regulated by auxin treatment, demonstrate  
362 enhanced chlorophyll accumulation as well as chloroplast development after detached  
363 from shoots and then mutant analyses indicate that auxin transported from the shoot  
364 represses chlorophyll accumulation via the function of ARF7, ARF19, and IAA14  
365 (Kobayashi *et al.*, 2012). A hypothesis based on these evidences can be draw that  
366 auxin, as a critical phytohormone, regulates chlorophyll accumulation and degradation  
367 via function of ARFs during fruit setting and fruit development.

368 Given the experimental phenomenon that IAA14 and ARF7/19 mediate auxin  
369 signaling pathway to repress chlorophyll biosynthetic genes in *Arabidopsis thaliana*  
370 (Kobayashi *et al.*, 2012), we speculate that auxin is likely to regulate chlorophyll  
371 biosynthesis and accumulation via activated or repressed transcriptional function of  
372 ARFs. Previous work manifested that DR12/ARF4, a member of the tomato ARF  
373 gene family of transcription factors, influences the regulation of fruit development,  
374 that is, transgenic tomato plants with down-regulated *SIARF4* expression levels bore  
375 dark-green fruit at immature stages, with significantly increased chlorophyll content,  
376 and accumulated more starch at incipient stages of fruit development as well as more  
377 sugar at the ripening stages. *SIARF4* may function through the transcriptional  
378 repression of *GLK1* gene expression in tomato fruits (Sagar *et al.*, 2013; Jones *et al.*,  
379 2002). Conversely, in the current research, up-regulation of *SIARF10*, another  
380 transcriptional repressor, elicits enhanced chlorophyll accumulation in tomato fruit.  
381 Also, our results showed overexpression of *SIARF10* increased accumulation of  
382 *SIGLKI* transcripts in the fruits. *SIARF10* may control chlorophyll accumulation  
383 through regulating the expression of *SIGLKI*. Our results also support the idea that  
384 transcriptional regulation of the photosynthetic activity may be through a common  
385 route in tomato fruits. It is possible that ARF10 and other ARF efficiently bind to  
386 form stable dimerization complexes, such as those found in ARF6 and ARF8 in  
387 *Arabidopsis*.

388 Chlorophyll a is initially synthesized from glutamyl-tRNA<sub>glu</sub>, and chlorophyll b is  
389 synthesized from chlorophyll at the final step of chlorophyll biosynthesis. Analysis of  
390 the complete genome of *Arabidopsis thaliana* elucidated that there are 15 enzymes  
391 encoded by 27 genes for chlorophyll biosynthesis (Beale *et al.*, 1999; Nagata *et al.*,

392 2013). Although the underlying mechanism for auxin controlling chlorophyll  
393 biosynthesis pathway remains poorly understood, we hypothesize that the function of  
394 ARFs, during chlorophyll biosynthesis, is likely to regulate key gene expression such  
395 as HEMA1, HEMA2, and HEMA3. The reduction of glutamyl-tRNA catalyzed by  
396 glutamyl-tRNA reductase (GluTR) which is encoded by HEMA1, HEMA2, and  
397 HEMA3, is the rate-limiting and an vital regulation step in the tetrapyrrole  
398 biosynthetic pathway (Zhao *et al.*, 2014).

399 *SIARF10* up-regulated lines displayed dark-green fruit phenotypes in parallel with  
400 those showed by *SIARF4* down-regulated lines with enhanced chlorophyll content  
401 (Sagar *et al.*, 2013). Whereas, in contrast to *SIARF4* under-expressing plants where  
402 dark-green phenotype is restricted to immature fruits, significantly higher chlorophyll  
403 content in *SIARF10* over-expressed lines was detected in both leaf and fruit tissues.  
404 This feature indicated that, in contrast with *SIARF4*, *SIARF10* control of chlorophyll  
405 accumulation is not fruit-specific. Furthermore, the higher chlorophyll content in  
406 *SIARF10* over-expressed lines correlating with a higher photochemical efficiency  
407 compared with wildtype elicits elevated starch levels and sugar content in the  
408 transgenic fruit. Although the prevailing theory is that predominant fruit growth and  
409 metabolism are sustained by photoassimilate supply from the original source (Ruan *et*  
410 *al.*, 2012), our result cannot exclude that increased starch and sugar content in  
411 OE-*SIARF10* lines could also results from a more effective transportation of  
412 photoassimilate into fruit. It is possible that enhanced leaf photosynthesis observed in  
413 up-regulated transgenic lines is a supposed supply that could provide fruit with  
414 photoassimilate. This viewpoint is consistent with experimental evidence that that  
415 down-regulation of *SIIAA9* alters auxin sensitivity and facilitates the development of  
416 vascular bundles (Wang *et al.*, 2005), thereby likely increasing sink strength as well as  
417 assimilation product supply to the fruit.

418 Starch is not only a significant carbohydrate reserve in the majority of plant but  
419 also a predominant factor to define fruit nutrition and favor. In plant starch synthesis,  
420 the first regulatory step, the synthesis of ADP-glucose, is catalyzed by AGPase from  
421 glucose-1-phosphate and ATP (Yin *et al.*, 2009; Stark *et al.*, 1992). Experimental  
422 evidences were then provided showing that, in potato (*Solanum tuberosum*) tubers,  
423 this critical catalytic reaction is also the limiting step during starch biosynthesis  
424 (Tiessen *et al.*, 2002). It has been reported that auxin regulates expression of the  
425 *SIAGPase* gene (Miyazawa *et al.*, 1999), and indeed down-regulation of *SIARF4*

426 increased both starch content and the expression of essential genes involved in starch  
427 biosynthesis in tomato fruit, particularly genes coding for AGPase (Sagar *et al.*, 2013).  
428 In our research, the improved starch content in *SIARF10* up-regulating lines correlates  
429 well with the increased expression of *AGPase* genes in starch biosynthesis, indicating  
430 that *SIARF10* likely regulates starch accumulation via controlling *SIAGPase* gene  
431 expression. Up-regulation of *SIARF10* also leads to higher soluble sugar content at  
432 various stages of tomato fruit while down-regulation fruit displays decreased sugar  
433 accumulation, likely owing to the different content of starch which could be degraded  
434 into soluble sugars at the developmental stage of plant fruit. This is in accordance  
435 with previous studies demonstrating that incipient starch content determines soluble  
436 solid content during fruit development (Schaffer *et al.*, 2000; Baxter *et al.*, 2005).

437 Overall, the current study demonstrates that *SIARF10* gene plays a significant role  
438 in chlorophyll accumulation during fruit development in tomato. The data also has  
439 shed some light on the ability of auxin regulating starch accumulation during fruit  
440 development via altering gene expression of *SIARF10*. However, auxin regulation of  
441 carbohydrate accumulation, especially its connection with other regulatory  
442 mechanisms, are still to be elucidated. Future work will center on illuminating auxin  
443 regulatory network for chlorophyll and starch biosynthesis including reveal gene  
444 function of relevant transcriptional factors.

445

#### 446 **Acknowledgements**

447 This work was supported by the National Key Research and Development Program  
448 (2016YFD0400100), the Project of Chongqing Science and Technology Commission  
449 (CSTC2015JCYJA80018), the National Natural Science Foundation of China  
450 (31272165) and the National Basic Research Program of China (2013CB127106).

451

#### 452 **References**

- 453 **Baxter CJ, Carrari F, Bauke A, Overy S, Hill SA, Quick PW, Fernie AR,**  
454 **Sweetlove LJ.** 2005. Fruit carbohydrate metabolism in an introgression Sagar et  
455 al. line of tomato with increased fruit soluble solids. *Plant Cell Physiology* **46**,  
456 425–437
- 457 **Beale SI.** 1999. Enzymes of chlorophyll biosynthesis. *Photosynthesis research* **60(1)**,  
458 43-73.
- 459 **Boer DR, Freire-Rios A, Van den Berg WA, et al.** 2014. Structural basis for DNA

- 460 binding specificity by the auxin-dependent ARF transcription factors. *Cell* **156**(3),  
461 577-589.
- 462 **Chaabouni S, Jones B, Delalande C, Wang H, Li ZG, Mila I, Latche A, Pech JC,**  
463 **Bouzayen M.** 2009. The SI-IAA3 tomato Aux/IAA gene is in the cross-roads of  
464 auxin and ethylene signalling involved in differential growth. *Journal of*  
465 *Experimental Botany* **60**, 1349–1362
- 466 **Ckurshumova W, Smirnova T, Marcos D, Zayed Y, Berleth T.** 2014. rrepressible  
467 MONOPTEROS/ARF5 promotes de novo shoot formation. *New Phytologist* **204**,  
468 556–566.
- 469 **Davies JN, Cocking EC.** 1965. Changes in carbohydrate, proteins and nucleic acids  
470 during cellular development in tomato fruit locule tissue. *Planta* **67**, 242–253.
- 471 **De Jong M, Wolters-Arts M, Feron R, Mariani C, Vriezen WH.** 2009. The  
472 *Solanum lycopersicum* auxin response factor 7 (SlARF7) regulates auxin  
473 signaling during tomato fruit set and development. *The Plant Journal* **57**,  
474 160–170.
- 475 **De Jong M, Wolters-Arts M, Schimmel BC, et al.** 2015. *Solanum lycopersicum*  
476 AUXIN RESPONSE FACTOR 9 regulates cell division activity during early  
477 tomato fruit development. *Jurnal of Experimental Botany* **66**, 3405-3416
- 478 **Deng W, Yang YW, Ren ZX, Audran-Delalande C, Mila I, Wang XY, Song HL,**  
479 **Hu YH, Bouzayen M.** 2012, The tomato SIIAA15 is involved in trichome  
480 formation and axillary shoot development. *New Phytologist* 194, 379–390.
- 481 **Devoghalaere F, Doucen T, Guitton B et al.** 2012 A genomics approach to  
482 understanding the role of auxin in apple (*Malus x domestica*) fruit size control.  
483 *BMC Plant Biology* **12**, 7
- 484 **Galpaz N Wang Q, Menda N, Zamir D, Hirschberg J.** 2008. Abscisic acid  
485 deficiency in the tomato mutant high-pigment 3 leading to increased plastid  
486 number and higher fruit lycopene content. *The Plant Journal* **53**, 717–730.
- 487 **Guan XX, Xu T, Gao S, Qi MF, Wang YL, Liu X, Li TL.** 2013. Temporal and spatial  
488 distribution of auxin response factor genes during tomato flower abscission.  
489 *Journal of Plant Growth Regulation* **33**, 17–327.
- 490 **Guilfoyle TJ, Hagen G.** 2007. Auxin response factors. *Current opinion in plant*  
491 *biology*, **10**(5), 453-460.
- 492 **Hendelman A, Buxdorf K, Stav R, Kravchik M, Arazi T.** 2012. Inhibition of  
493 lamina outgrowth following *Solanum lycopersicum* AUXIN RESPONSE

- 494 FACTOR 10 (SIARF10) derepression. *Plant Molecular Biology* Apr **78**,  
495 561-576.
- 496 **Ho LC, 1996. Tomato.** In E Zamski, AA Scheffer, eds, Photoassimilate distribution  
497 plants and crops: source-sink relationship. New York: Marcel Dekker, pp  
498 709-727.
- 499 **Ho LC, Hewitt JD.** 1986. Fruit development. In JG Atherton, J Rudich, eds, The  
500 tomato crop. London: Chapman and Hall, pp 201-240.
- 501 **Jones B, Frasse P, Olmos E, Zegzouti H, Li ZG, Latché A, Pech JC, Bouzayen, M.**  
502 2002. Down-regulation of DR12, an auxin-response-factor homolog, in the  
503 tomato results in a pleiotropic phenotype including dark green and blotchy  
504 ripening fruit. *The Plant Journal* **32(4)**, 603-613.
- 505 **Kim J, Harter K, Theologis A.** 1997. Protein-protein interactions among the  
506 Aux/IAA proteins. *Proceedings of the National Academy of Sciences USA* **94**,  
507 11786–11791.
- 508 **Klee HJ, Giovannoni JJ.** 2011. Genetics and control of tomato fruit ripening and  
509 quality attributes. *Annual Review of Genetics* **45**, 41–59.
- 510 **Kobayashi K, Baba S, Obayashi T et al.** 2012. Regulation of root greening by light  
511 and auxin/cytokinin signaling in *Arabidopsis*. *Plant Cell* **24(3)**, 1081-1095.
- 512 **Kolotilin I, Koltai H, Tadmor Y, Bar-Or C, Reuveni M, Meir A, Nahon S, Shlomo**  
513 **H, Chen L, Levin I.** 2007. Transcriptional profiling of high pigment 2(dg)  
514 tomato mutant links early fruit plastid biogenesis with its overproduction of  
515 phytonutrients. *Plant Physiology* **145**, 389–401.
- 516 **Krogan NT, Ckurshumova W, Marcos D, Caragea AE, Berleth T.** 2011. Deletion  
517 of MP/ARF5 domains III and IV reveals a requirement for Aux/IAA regulation  
518 in *Arabidopsis* leaf vascular patterning. *New Phytologist* **194**, 391–401.
- 519 **Li SB, Xie ZZ, Hu CG, Zhang JZ.** 2016. A review of auxin response factors (ARFs)  
520 in plants. *Frontiers in Plant Science* **7**, 47
- 521 **Liu X, Dinh T, Li D, Shi B, Li Y, Cao X, Guo L, Pan YY, Jiao YL, Chen XM.**  
522 2014. AUXIN RESPONSE FACTOR 3 integrates the functions of AGAMOUS  
523 and APETALA2 in floral meristem determinacy. *The Plant Journal* **80**, 629–641.
- 524 **Liu Y, Roof S, Ye Z, Barry C, van Tuinen A, Vrebalov J, Bowler C, Giovannoni J.**  
525 2004. Manipulation of light signal transduction as a means of modifying fruit  
526 nutritional quality in tomato. *Proceedings of the National Academy of Sciences*  
527 *USA* **101**, 9897–9902.



- 528 **Lopez-Juez E, Pyke KA.** 2004. Plastids unleashed: their development and their  
529 integration in plant development. *International Journal of Developmental*  
530 *Biology* **49**, 557-577.
- 531 **Manoharan RK, Jung HJ, Hwang I, Jeong N, Kho KH, Chung MY, Nou IS.** 2017.  
532 Molecular breeding of a novel orange-brown tomato fruit with enhanced  
533 beta-carotene and chlorophyll accumulation. *Hereditas* **154**, 1
- 534 **Miyazawa Y, Sakai A, Miyagishima SY, Takano H, Kawano S, Kuroiwa T.** 1999.  
535 Auxin and cytokinin have opposite effects on amyloplast development and the  
536 expression of starch synthesis genes in cultured bright yellow-2 tobacco cells.  
537 *Plant Physiology* **121(2)**, 461-470.
- 538 **Nadakuduti SS, Holdsworth WL, Klein CL, Barry CS.** 2014. KNOX genes  
539 influence a gradient of fruit chloroplast development through regulation of  
540 GOLDEN2-LIKE expression in tomato. *The Plant Journal* **78(6)**, 1022-1033.
- 541 **Nagata N, Tanaka R, Satoh S, Tanaka A.** 2005. Identification of a vinyl reductase  
542 gene for chlorophyll synthesis in *Arabidopsis thaliana* and implications for the  
543 evolution of *Prochlorococcus* species. *Plant Cell* **17(1)**, 233-240.
- 544 **Nguyen CV, Vrebalov JT, Gapper NE, Zheng Y, Zhong S, Fei Z, Giovannoni JJ.**  
545 **2014.** Tomato Golden 2-like (GLK) transcription factors reveal molecular  
546 gradients functioning during fruit development and ripening. *Plant Cell* **26**,  
547 585–601.
- 548 **Obiadalla-Ali H, Fernie AR, Lytovchenko A, Kossmann J, Lloyd JR.** 2004.  
549 Inhibition of chloroplastic fructose 1,6-bisphosphatase in tomato fruits leads to  
550 decreased fruit size, but only small changes in carbohydrate metabolism. *Planta*  
551 **219**, 533–540.
- 552 **Powell ALT, Nguyen CV, Hill T, et al.** 2012. Uniform ripening encodes a Golden  
553 2-like transcription factor regulating tomato fruit chloroplast development.  
554 *Science* **336**, 1711–1715.
- 555 **Ren ZX, Li ZG, Miao Q, Yang YW, Deng W, Hao Y.** 2011, The auxin receptor  
556 homologue in *Solanum lycopersicum* stimulates tomato fruit set and leaf  
557 morphogenesis. *Journal of Experimental Botany* **62**, 2815–2826.
- 558 **Rohrmann J, Tohge T, Alba R, et al.** 2011. Combined transcription factor profiling,  
559 microarray analysis and metabolite profiling reveals the transcriptional control of  
560 metabolic shifts occurring during tomato fruit development. *The Plant Journal* **68**,  
561 999–1013.

- 562 **Ruan YL, Patrick JW, Bouzayen M, Osorio S, Fernie AR.** 2012. Molecular  
563 regulation of seed and fruit set. *Trends in Plant Science* **17**, 656–665.
- 564 **Sagar M, Chervin C, Mila I, et al.** 2013. Sl-ARF4, an auxin response factor  
565 involved in the control of sugar metabolism during tomato fruit development.  
566 *Plant Physiology* **161**, 1362–1374.
- 567 **Schaffer AA, Levin I, Oguz I, Petreikov M, Cincarevsky F, Yeselson Y, Shen S,**  
568 **Gilboa N, Bar M.** 2000. ADP glucose pyrophosphorylase activity and starch  
569 accumulation in immature tomato fruit: the effect of a *Lycopersicon*  
570 *hirsutum*-derived introgression encoding for the large subunit. *Plant Science* **152**,  
571 135–144.
- 572 **Schaffer AA, Petreikov M.** 1997. Sucrose-to-Starch Metabolism in Tomato Fruit  
573 Undergoing Transient Starch Accumulation. *Plant Physiology* **113**, 739-746.
- 574 **Stark DM, Timmerman KP, Barry GF, Preiss J, Kishore GM.** 1992. Regulation of  
575 the amount of starch in plant tissues by ADP glucose pyrophosphorylase. *Science*  
576 **258**, 287–292.
- 577 **Su L, Diretto G, Purgatto E, Danoun S, Zouine M, Li Z, Roustan JP, Bouzayen**  
578 **M, Giuliano G, Chervin C.** 2015. Carotenoid accumulation during tomato fruit  
579 ripening is modulated by the auxin-ethylene balance. *BMC Plant Biology* **15(1)**,  
580 114.
- 581 **Tanaka A, Fujita K, Kikuchi K.** 1974. Nutrio-physiological studies on the tomato  
582 plant. III. Photosynthetic rate on individual leaves in relation to dry matter  
583 production of plants. *Soil Science and Plant Nutrition* **20**, 173–183.
- 584 **Tanksley SD.** 2004. The genetic, developmental, and molecular bases of fruit size  
585 and shape variation in tomato. *Plant Cell* **16**, S181-S189.
- 586 **Tiessen A, Hendriks JHM, Stitt M, Branscheid A, Gibon Y, Farre EM,**  
587 **Geigenberger P.** 2002. Starch synthesis in potato tubers is regulated by  
588 post-translational redox modification of ADP-glucose pyrophosphorylase: A  
589 noble regulatory mechanism linking starch synthesis to the sucrose supply. *Plant*  
590 *Cell* **14**, 2191–2213.
- 591 **Tiwari SB, Hagen G, Guilfoyle T.** 2003. The roles of auxin response factor domains  
592 in auxin-responsive transcription. *Plant Cell* **15**, 533–543.
- 593 **Ulmasov T, Hagen G, Guilfoyle TJ.** 1999. Activation and repression of transcription  
594 by auxin-response factors. *Proceedings of the National Academy of Sciences*  
595 *USA* **96(10)**, 5844-5849.

- 596 **Wang Y, Deng D, Shi Y, Miao N, Bian Y, Yin Z.** 2012. Diversification, phylogeny  
597 and evolution of auxin response factor (ARF) family: insights gained from  
598 analyzing maize ARF genes. *Molecular Biology Reports* **39**, 2401–2415.
- 599 **Waters MT, Moylan EC, Langdale JA.** 2008. GLK transcription factors regulate  
600 chloroplast development in a cell-autonomous manner. *The Plant Journal* **56**,  
601 432–444.
- 602 **Yin YG, Kobayashi Y, Sanuki A, Kondo S, Fukuda N, Ezura H, Sugaya S,**  
603 **Matsukura C.** 2009. Salinity induces carbohydrate accumulation and  
604 sugar-regulated starch biosynthetic genes in tomato (*Solanum lycopersicum* L.  
605 cv. 'Micro-Tom') fruits in an ABA-and osmotic stress-independent manner.  
606 *Journal of Experimental Botany* **61(2)**, 563-574.
- 607 **Zhang XL, Yan F, Tang YW, Yuan YJ, Deng W, Li ZG.** 2015, Auxin Response  
608 Gene SIARF3 Plays Multiple Roles in Tomato Development and is Involved in  
609 the Formation of Epidermal Cells and Trichomes. *Plant Cell Physiology* **56**,  
610 2110-2124.
- 611 **Zhao AG, Fang Y, Chen XM, Zhao S, Dong W, Lin YJ, Gong WM, Liu, L.** 2014.  
612 Crystal structure of Arabidopsis glutamyl-tRNA reductase in complex with its  
613 stimulator protein. *Proceedings of the National Academy of Sciences USA*  
614 **111(18)**, 6630-6635.
- 615 **Zouine M, Fu Y, Chateigner-Boutin AL, Mila I, Frasse P, Wang H, Audran C,**  
616 **Roustan J, Bouzayen1 M.** 2014, Characterization of the tomato ARF gene  
617 family uncovers a multi-levels post-transcriptional regulation including  
618 alternative splicing. *PLoS One* **9**, e84203.
- 619  
620  
621  
622  
623  
624  
625  
626  
627  
628  
629

630 **Figure legend**

631 Fig. 1. Expression pattern of *SIARF10* gene in tomato plants. A, Online analysis of  
632 *SIARF10* gene in tomato plants  
633 (<http://gbf.toulouse.inra.fr/tomexpress/www/welcomeTomExpress.php>). The depth of  
634 red color indicates the expression level of the gene. B, qRT-PCR analysis of  
635 expression level of *SIARF10*. The tomato housekeeping gene ubiquitin gene was used  
636 as reference. The data represent mean  $\pm$ SD of three replicates.

637

638 Fig. 2. Transcriptional activation activity and subcellular localization analysis of  
639 *SIARF10*. A, subcellular localization analysis. PCX-DG-GFP was negative control;  
640 PCX-DG-*SIARF6*-GFP was positive control. Bar is 15 $\mu$ m. B, Transcriptional  
641 activation activity. The yeast cells, with the negative control plasmid pGBKT7,  
642 positive control pGBKT7-*SIARF6* and pGBKT7-*SIARF10* (right), were grown on  
643 plates with SD/-Trp or SD/-Trp-His-Ade medium.

644

645 Fig. 3. Generation of *SIARF10* transgenic plants and fruit phenotypes. A, qRT-PCR  
646 analysis of the expression of *SIARF10* in transgenic lines. B, fruit phenotypes. WT,  
647 wild type plants, OE-*SIARF10*, *SIARF10* overexpression lines, RNAi-*SIARF10*,  
648 *SIARF10* RNAi lines. DAP, days after pollination. MG, mature green fruit; BR,  
649 breaker fruit; OF, orange fruit; R, red fruit. The data represent mean  $\pm$ SD of three  
650 replicates. “\*” and “\*\*\*”, significant difference between transgenic and WT plants with  
651  $P < 0.05$  and  $P < 0.01$ , respectively, as determined by t-test.

652

653 Fig. 4. Chlorophyll accumulation in *SIARF10* transgenic plants. A-B, chlorophyll  
654 contents in leaves and fruits of OE-*SIARF10* and RNAi-*SIARF10* plants. The data  
655 represent mean  $\pm$ SD of three replicates. “\*” and “\*\*\*”, significant difference between  
656 transgenic and WT plants with  $P < 0.05$  and  $P < 0.01$ , respectively, as determined by  
657 t-test. C, Autofluorescence of chlorophylls in pericarp of tomato fruits determined by  
658 confocal laser scanning microscopy. OE-*SIARF10*, *SIARF10* overexpression lines,  
659 RNAi-*SIARF10*, *SIARF10* RNAi lines.

660

661 Fig. 5. Photochemical potential in *SIARF10* transgenic plants. A, photochemical  
662 potential in fruits. B. photochemical potential in leaves. The data represent mean  $\pm$ SD

663 of three replicates. “\*” and “\*\*\*”, significant difference between transgenic and WT  
664 plants with  $P < 0.05$  and  $P < 0.01$ , respectively, as determined by t-test.

665

666 Fig. 6. Starch accumulation in fruits of *SIARF10* transgenic plants. A, Iodine staining  
667 of tomato fruit at different developmental stages. B, starch content in transgenic plants.  
668 The data represent mean  $\pm$ SD of three replicates. “\*” and “\*\*\*”, significant difference  
669 between transgenic and WT plants with  $P < 0.05$  and  $P < 0.01$ , respectively, as  
670 determined by t-test.

671

672 Fig. 7. Accumulation of photosynthetic substances in fruits of *SIARF10* transgenic  
673 plants. Fructose (A) and glucose (B) contents in overexpression transgenic plants.  
674 Sucrose (C) and lactose (D) contents in overexpression transgenic plants. Sucrose (E)  
675 and lactose (F) contents in RNAi transgenic plants. The data represent mean  $\pm$ SD of  
676 three replicates. “\*” and “\*\*\*”, significant difference between transgenic and WT  
677 plants with  $P < 0.05$  and  $P < 0.01$ , respectively, as determined by t-test.

678

679 Fig. 8. The expression of SIAGPase genes in *SIARF10* transgenic plants. The levels  
680 of transcripts were assessed in tomato fruit by RT-PCR at IMG, MG, BR stage for  
681 SIAGPaseL1 (L1), SIAGPaseL2 (L2), SIAGPaseL3 (L3), and SIAGPaseS1 (S1). The  
682 data represent mean  $\pm$ SD of three replicates. “\*” and “\*\*\*”, significant difference  
683 between transgenic and WT plants with  $P < 0.05$  and  $P < 0.01$ , respectively, as  
684 determined by t-test.

685

686 Fig. 9. Expression profile of the genes related with chlorophyll formation in *SIARF10*  
687 transgenic tomato fruits. *DDB1*, Solyc02g021650, UV damaged DNA binding protein  
688 1. *THY5*, Solyc08g061130, bZIP domain of plant elongated/long HY5-like  
689 transcription factors and similar proteins gene. *GLK1*, Solyc07g053630, golden2-like  
690 protein 1 gene. *GLK2*, Solyc10g008160, golden2-like protein 2 gene. *PR*,  
691 Solyc10g006900, protochlorophyllide reductase gene. *CBP1*, Solyc02g070990,  
692 chlorophyll binding protein 1 gene. *CBP2*, Solyc02g070950, chlorophyll binding  
693 protein 2 gene. The data represent mean  $\pm$ SD of three replicates. WT, Wild type plants.  
694 “\*” and “\*\*\*”, significant difference between transgenic and WT plants with  $P < 0.05$   
695 and  $P < 0.01$ , respectively, as determined by t-test.

**A**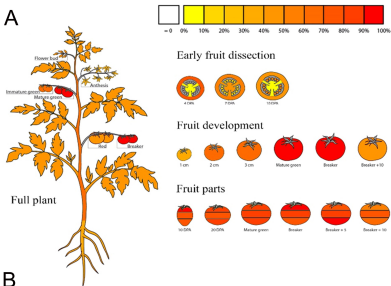**B**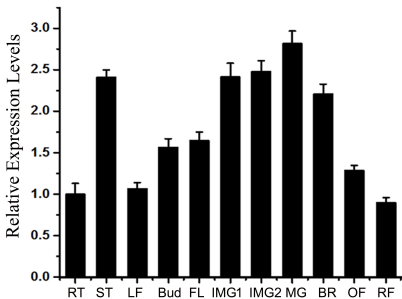

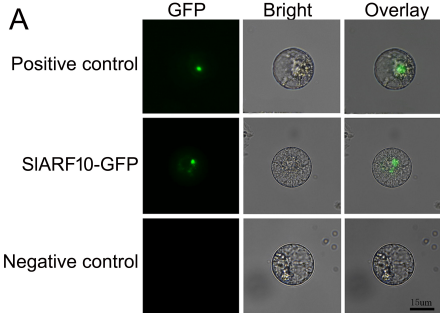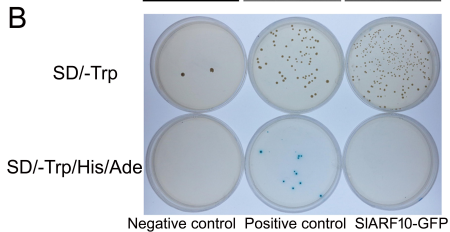

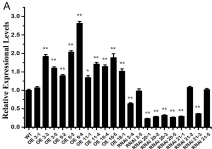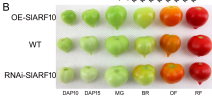



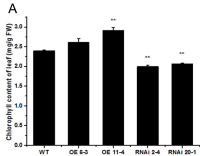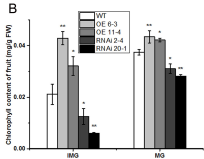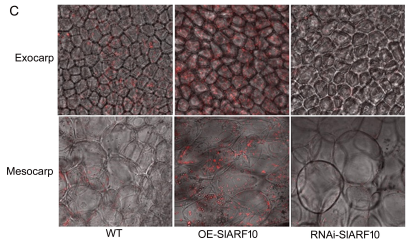

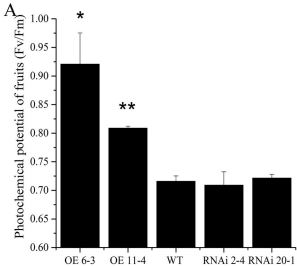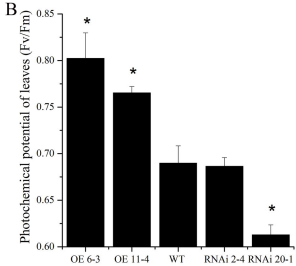

**A**

OE-SIARF10

WT

RNAi-SIARF10

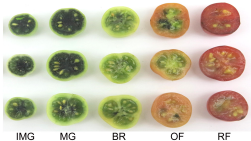**B**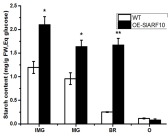**C**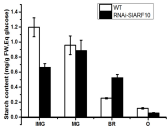

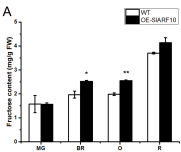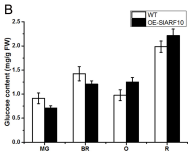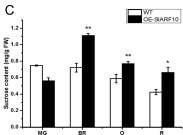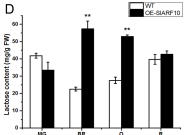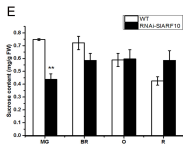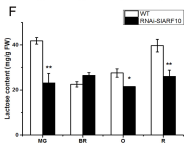

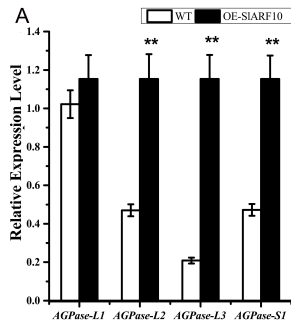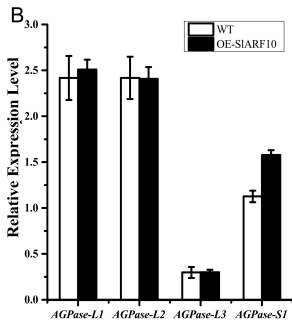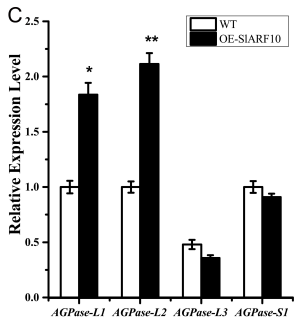

WT OE-ARF10 RNAi-ARF10

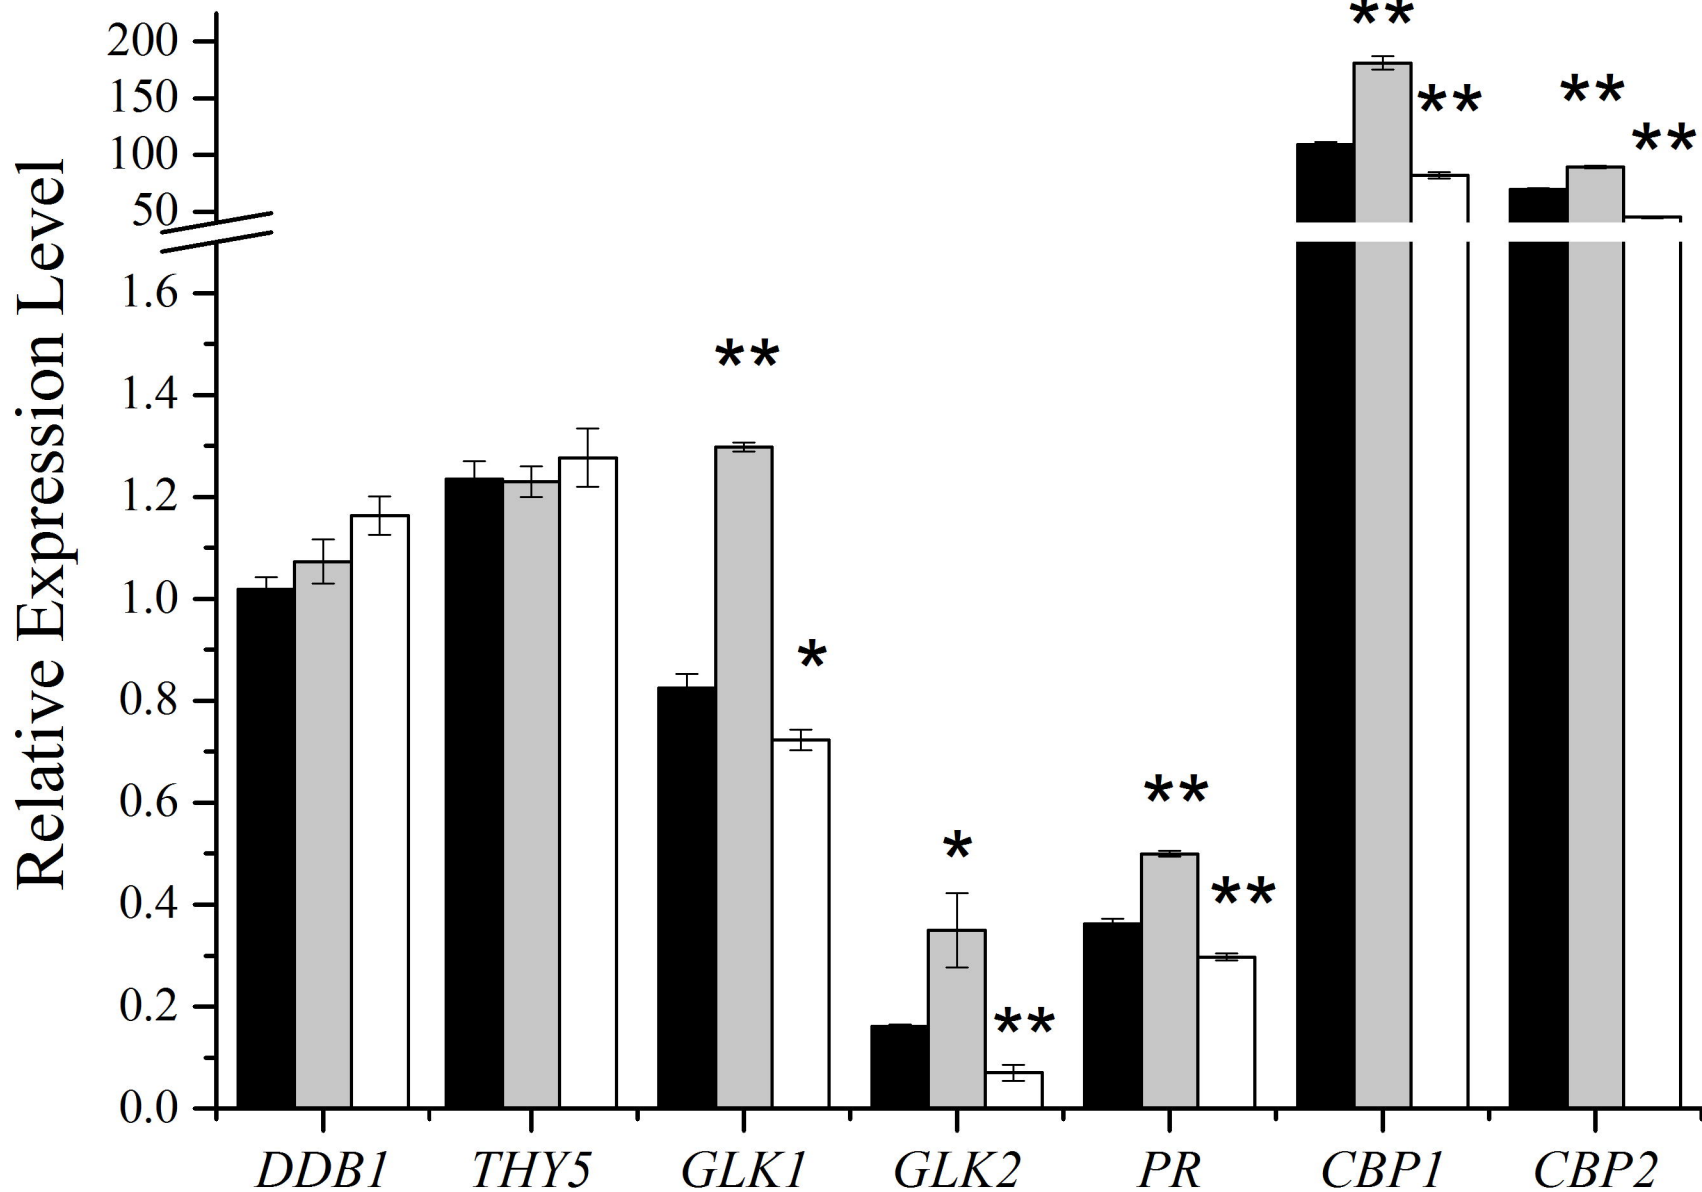

Source: https://www.biorxiv.org/content/10.1101/253237v1.full.pdf
